# Supplementary material for: Time Trends and Prognostic Factors for Overall Survival in Myxoid Liposarcomas: A Population-Based Study
Source: Hindawi journal article supplement (doi:10.1155/2020/2437850), 2020-09-22
Supplement: f1 [file 2437850.f1.pdf]

## Supplementary data

**Table 1.** Baseline characteristics of localized disease stratified by RCC

| Characteristics       | MLS<br>(≤ 5% RCC) | RC tumor (><br>5% RCC) | Total      | p-value      |
|-----------------------|-------------------|------------------------|------------|--------------|
| Total patients (n=)   | 779               | 72                     | 851        |              |
| <i>Age (years)</i>    |                   |                        |            | <b>0.009</b> |
| Median age (IQR)      | 48 (38-61)        | 53 (45-68)             | 49 (38-61) |              |
| <i>Tumor size</i>     |                   |                        |            | 0.438        |
| ≤ 5 cm                | 163 (21%)         | 12 (17%)               | 175 (21%)  |              |
| > 5cm                 | 546 (70%)         | 52 (72%)               | 598 (70%)  |              |
| <i>Gender</i>         |                   |                        |            | 0.923        |
| Male                  | 439 (56%)         | 41(56%)                | 480 (56%)  |              |
| Female                | 340 (44%)         | 31 (43%)               | 371 (44%)  |              |
| <i>Tumor location</i> |                   |                        |            | 0.263        |
| Upper Limb            | 49 (6%)           | 2 (3%)                 | 51 (6%)    |              |
| Lower Limb            | 507 (65%)         | 44 (56%)               | 551 (64%)  |              |
| Trunk                 | 150 (19%)         | 20 (28%)               | 170 (21%)  |              |
| Other                 | 73 (9%)           | 6 (8%)                 | 79 (9%)    |              |

**Table 2.** Localized myxoid liposarcoma: OS by age, tumor size, RCC and tumor location.

| Absolute OS rates in primary localized disease     |            |            |            |            |
|----------------------------------------------------|------------|------------|------------|------------|
|                                                    | 1 year     | 3 year     | 5 year     | 10 year    |
| <b>Age (years)</b>                                 |            |            |            |            |
| < 40 (n=238)                                       | 99%        | 95%        | 91%        | 79%        |
| 40-55 (n=304)                                      | 96%        | 89%        | 84%        | 74%        |
| 56-70 (n=204)                                      | 93%        | 78%        | 72%        | 64%        |
| > 70 (n=105)                                       | 71%        | 54%        | 47%        | 23%        |
| <b>Tumor size</b>                                  |            |            |            |            |
| ≤ 5cm (n=175)                                      | 98%        | 94%        | 92%        | 85%        |
| > 5cm (n=598)                                      | 93%        | 82%        | 76%        | 64%        |
| <b>RCC</b>                                         |            |            |            |            |
| MLS (n=779)                                        | 94%        | 84%        | 79%        | 68%        |
| RC tumor (n=72)                                    | 85%        | 73%        | 68%        | 52%        |
| <b>Tumor Location</b>                              |            |            |            |            |
| Lower Limb (n=551)                                 | 97%        | 89%        | 84%        | 73%        |
| Trunk (n=170)                                      | 86%        | 75%        | 70%        | 57%        |
| Upper Limb (n=51)                                  | 98%        | 92%        | 92%        | 81%        |
| Other (n=79)                                       | 76%        | 55%        | 47%        | 35%        |
| <b>All patients with localized disease (n=851)</b> | <b>93%</b> | <b>83%</b> | <b>78%</b> | <b>66%</b> |

**Table 3.** Association Cox regression Model to test the association for OS between RCC and patient and tumor characteristics

| Characteristics                       | HR (95% CI)      | P     | Δ%  |
|---------------------------------------|------------------|-------|-----|
| <b>RC tumor</b>                       | 1.66 (1.20-2.31) | 0.002 |     |
| + <b>Age</b>                          | 1.44 (1.04-1.99) | 0.030 | -13 |
| + <b>Tumor size &gt;5cm</b>           | 1.55 (1.09-2.21) | 0.015 | -7  |
| + <b>Male gender</b>                  | 1.67 (1.21-2.32) | 0.002 | 0   |
| + <b>Tumor location</b>               | 1.76 (1.26-2.44) | 0.047 | 6   |
| + <b>Age &amp; tumor size &gt;5cm</b> | 1.36 (0.95-1.93) | 0.093 | -18 |
